# Supplementary material for: Transition metal small clusters anchored on biphenylene for effective electrocatalytic nitrogen reduction
Source: Royal Society of Chemistry journal article supplement (doi:10.1039/d3cp05763a), 2024-01-01
Supplement: d3cp05763a1.pdf [file d3cp05763a1.pdf]

## Transition Metal Small Clusters Anchored on Biphenylene for Effective Electrocatalytic Nitrogen Reduction

Yan Gao<sup>a, b</sup>, Qingchen Li<sup>b</sup>, Zhili Yin<sup>a</sup>, Haifeng Wang<sup>b, \*</sup>, Zhong Wei<sup>a, \*</sup> and Junfeng Gao<sup>c, \*</sup>

<sup>a</sup>School of Chemistry and Chemical Engineering, Shihezi University, Shihezi 832003, China. Email: steven\_weiz@sina.com.

<sup>b</sup>Department of Physics, College of Science, Shihezi University, Shihezi 832003, China. Email: whfeng@shzu.edu.cn.

<sup>c</sup>Key Laboratory of Materials Modification by Laser, Ion and Electron Beams (Dalian University of Technology), Ministry of Education, Dalian 116024, China. Email: gaojf@dlut.edu.cn.

### Table of Contents

**Fig. S1** The optimized structures and relative energies of TM<sub>1-4</sub> clusters anchored on BPN sheet taking Ru as an example.

**Fig. S2** The most stable structures for nine TM<sub>1-4</sub> clusters anchored on BPN sheet.

**Fig. S3** Possible stable structures of N<sub>2</sub> adsorption on Ru<sub>n</sub>@BPN systems.

**Fig. S4** The Gibbs free energy profile  $\Delta G$  (\*N<sub>2</sub>) of TM<sub>2</sub> and TM<sub>4</sub> clusters anchored on BPN sheet.

**Fig. S5** Variation of energy with time for AIMD simulation of W<sub>2</sub>/Ru<sub>2</sub>/Mo<sub>4</sub> clusters anchored on BPN sheet at 300 and 600 K for a period of 10 ps.

**Figure S6.** Bader charge transfers (|e|) of the TM<sub>1-4</sub>@BPN with the number of TM atoms.

**Table S1** Bader charge dispersion (e) of the Ru<sub>1-4</sub>@BPN and Re<sub>3</sub><sup>-</sup>, Mo<sub>3</sub>@BPN catalysts..

**Table S2** Total Bader charge dispersion (|e|) of the TM<sub>1-4</sub>@BPN catalysts.

**Table S3** Bader charge dispersion (|e|) of the TM<sub>2</sub>@BPN catalysts.

**Table S4** Zero-point and entropic corrections to the free energy of the gas phase and the adsorbed species for the screened six types of catalysts.

**Table S5** The optimized geometry of screened catalysts W<sub>2</sub>@BPN, Ru<sub>2</sub>@BPN and Mo<sub>4</sub>@BPN.

| Ru <sub>1</sub> @BPN |                        |                        |                        |                        |
|----------------------|------------------------|------------------------|------------------------|------------------------|
|                      | H <sub>1</sub>         | H <sub>2</sub>         | H <sub>3</sub>         | T <sub>1</sub>         |
| Initial              |                        |                        |                        |                        |
| Final                |                        |                        |                        |                        |
| Relative energy/eV   | <b>0</b>               | 0.26                   | 0.50                   | Move to H <sub>1</sub> |
|                      | T <sub>2</sub>         | B <sub>1</sub>         | B <sub>2</sub>         | B <sub>3</sub>         |
| Initial              |                        |                        |                        |                        |
| Final                |                        |                        |                        |                        |
| Relative energy/eV   | Move to H <sub>2</sub> | Move to H <sub>1</sub> | Move to H <sub>1</sub> | Move to H <sub>2</sub> |

| Ru <sub>2</sub> @BPN |          |      |      |      |
|----------------------|----------|------|------|------|
| Sites                |          |      |      |      |
| Relative energy/eV   | <b>0</b> | 0.28 | 0.10 | 0.37 |
| Sites                |          |      |      |      |
| Relative energy/eV   | 0.69     | 0.72 | 0.79 | 1.37 |
| Ru <sub>3</sub> @BPN |          |      |      |      |
| Sites                |          |      |      |      |
| Relative energy/eV   | <b>0</b> | 0.05 | 0.06 | 0.11 |
|                      |          |      |      |      |
|                      | 0.56     | 0.65 | 0.84 |      |

| Ru <sub>4</sub> @BPN |          |      |
|----------------------|----------|------|
| Sites                |          |      |
| Relative energy/eV   | <b>0</b> | 0.10 |

**Fig. S1** The optimized structures and relative energies of Ru<sub>1-4</sub> clusters anchored on BPN sheet.

|                          |                                       |                                          |                       |
|--------------------------|---------------------------------------|------------------------------------------|-----------------------|
| TM <sub>1</sub> @BP<br>N | TM = V, Fe, Ni, Mo, Ru, Rh, W, Re, Ir |                                          |                       |
|                          |                                       |                                          |                       |
| TM <sub>2</sub> @BP<br>N | Type 1<br>TM=V, Fe                    | Type 2<br>TM = Ni, Mo, Ru, Rh, W, Re, Ir |                       |
|                          |                                       |                                          |                       |
| TM <sub>3</sub> @BP<br>N | Type 1<br>TM = V, Fe, W               | Type 2<br>TM=Ni, Ru, Rh, Ir              | Type 3<br>TM = Mo, Re |
|                          |                                       |                                          |                       |
| TM <sub>4</sub> @BP<br>N | TM = V, Fe, Ni, Mo, Ru, Rh, W, Re, Ir |                                          |                       |
|                          |                                       |                                          |                       |

**Fig. S2** The most stable structures for nine TM<sub>1-4</sub> clusters anchored on BPN sheet.

**Structures of N<sub>2</sub> on Ru<sub>2-4</sub>@BPN**

|                      |           |                                                                                   |           |                                                                                       |
|----------------------|-----------|-----------------------------------------------------------------------------------|-----------|---------------------------------------------------------------------------------------|
| Ru <sub>2</sub> @BPN |           | 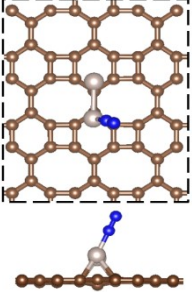 |           |                                                                                       |
| Sites                | Side on   | End on-1                                                                          | End on-2  |                                                                                       |
| Relative energy/eV   | /         | 0                                                                                 | 0.19      |                                                                                       |
| Ru <sub>3</sub> @BPN |           |                                                                                   |           |                                                                                       |
| Sites                | Side on-1 | Side on-2                                                                         | End on-1  | End on-2                                                                              |
| Energy/eV            | <b>0</b>  | 0.05                                                                              | <b>0</b>  | 0.18                                                                                  |
| Ru <sub>4</sub> @BPN |           |                                                                                   |           |  |
| Sites                | Side on-1 | Side on-2                                                                         | Side on-3 | Side on-4                                                                             |
| Relative energy/eV   | <b>0</b>  | 0.35                                                                              | 0.55      | 0.53                                                                                  |
| Ru <sub>4</sub> @BPN |           |                                                                                   |           |                                                                                       |
| Sites                | End on-1  | End on-2                                                                          |           |                                                                                       |
| Relative             | <b>0</b>  | 0.48                                                                              |           |                                                                                       |

|           |  |  |  |  |
|-----------|--|--|--|--|
| energy/eV |  |  |  |  |
|-----------|--|--|--|--|

**Fig. S3** Possible stable structures of N<sub>2</sub> adsorption on Ru<sub>n</sub>@BPN (n=2-4) systems.

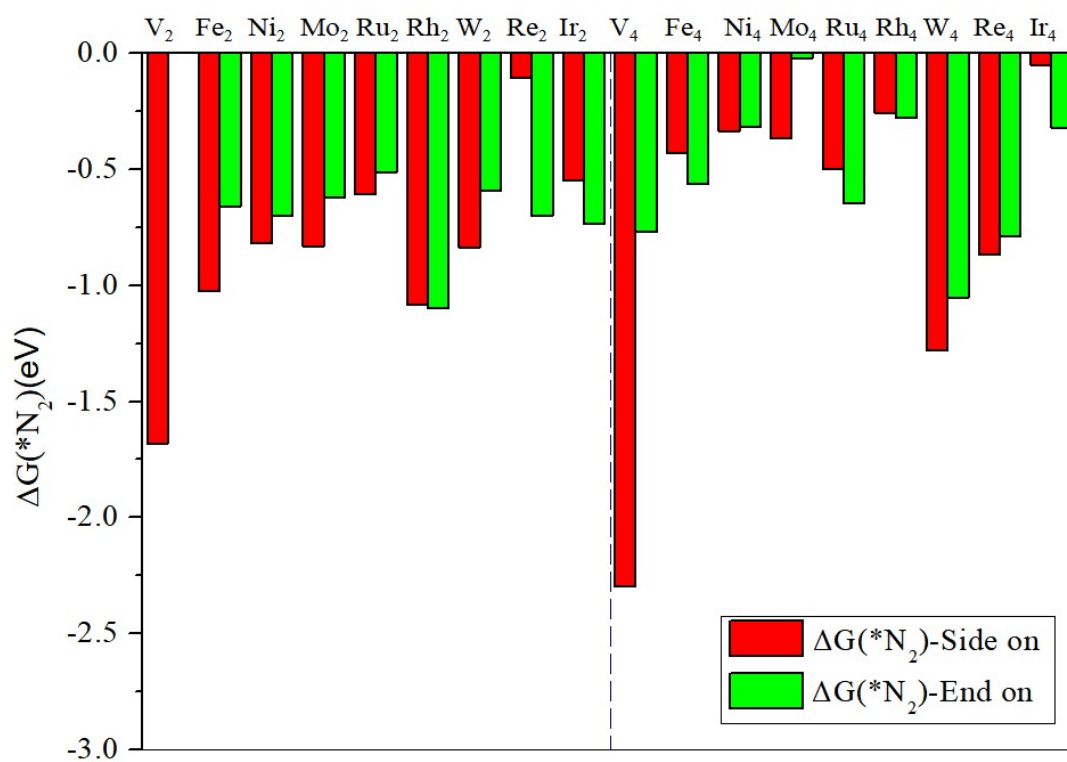

**Fig. S4.** The Gibbs free energy profile  $\Delta G(*N_2)$  of TM<sub>2</sub> and TM<sub>4</sub> clusters anchored on BPN sheet. Note the end-on manner of N<sub>2</sub> adsorption over V<sub>2</sub>@BPN can't be obtained.

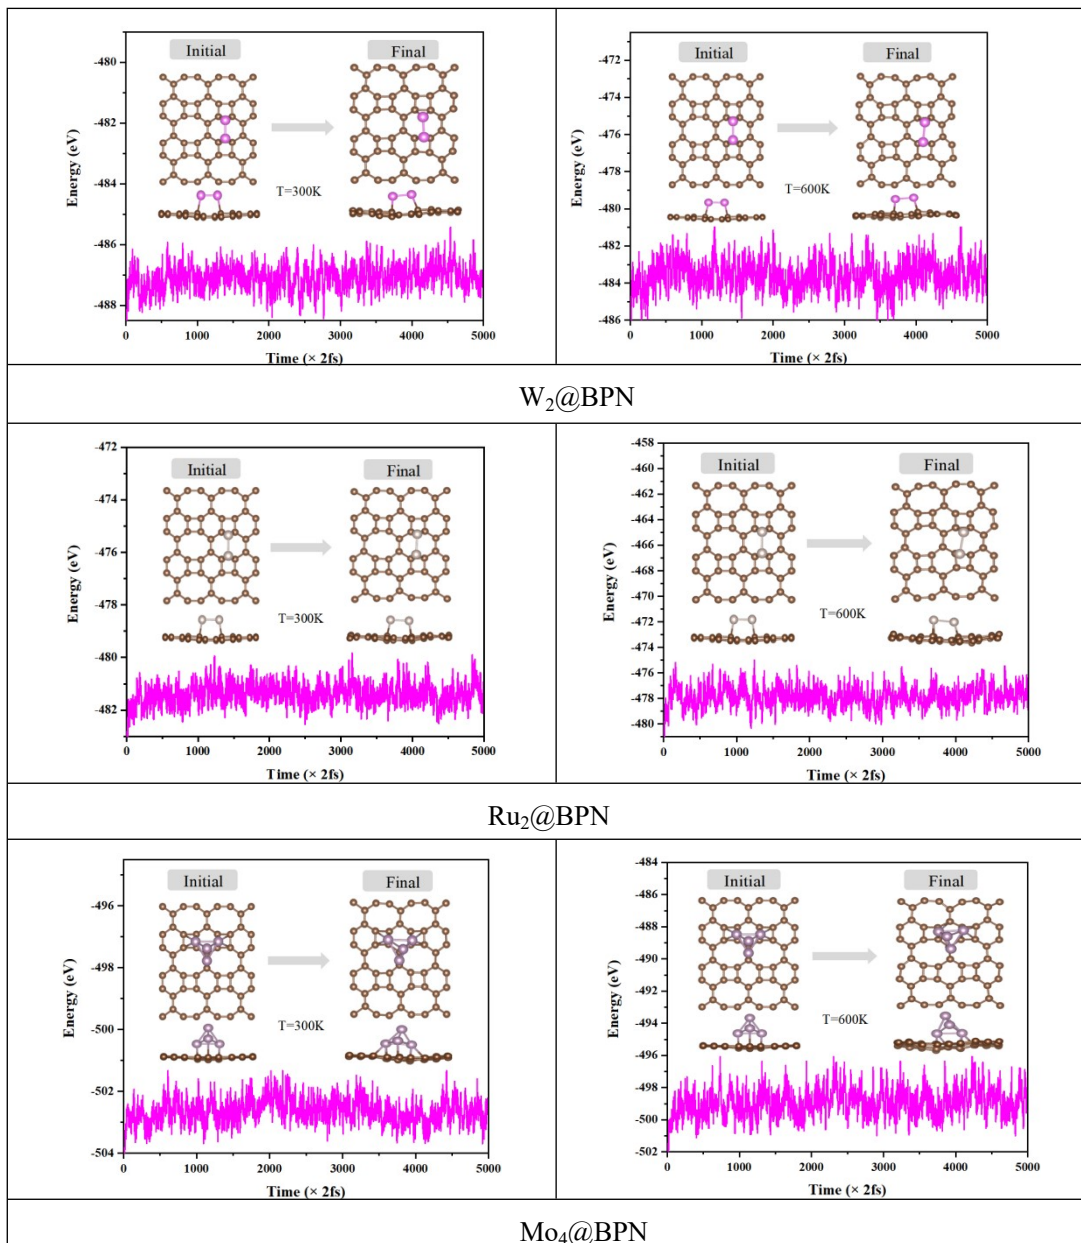



**Figure S5.** Variation of energy with time for AIMD simulation of  $W_2/Ru_2/Mo_4$  clusters anchored on BPN sheet at 300 and 600 K for a period of 10 ps.

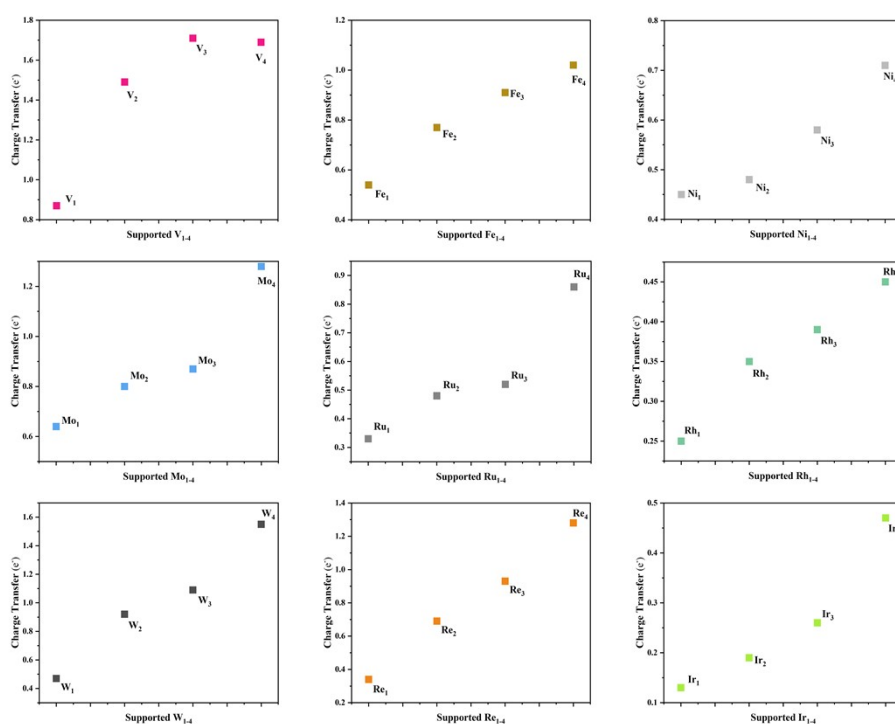

**Figure S6.** Bader charge transfers ( $e$ ) of the  $TM_{1-4}@BPN$  with the number of TM atoms.

**Table S1** Bader charge dispersion ( $e$ ) of the  $Ru_{1-4}@BPN$  and  $Re_3$ - and  $Mo_3@BPN$  catalysts.

| Atom | Charge of $Ru_1@BPN$ | Charge of $Ru_2@BPN$ | Charge of $Ru_3@BPN$ | Charge of $Ru_4@BPN$ | Charge of $Re_3@BPN$ | Charge of $Mo_3@BPN$ |
|------|----------------------|----------------------|----------------------|----------------------|----------------------|----------------------|
| 1    | +0.33                | +0.19                | +0.37                | -0.20                | -0.06                | -0.10                |
| 2    |                      | +0.19                | +0.37                | +0.35                | +0.47                | +0.47                |

|      |                                                                                   |                                                                                   |                                                                                   |                                                                                    |                                                                                     |       |
|------|-----------------------------------------------------------------------------------|-----------------------------------------------------------------------------------|-----------------------------------------------------------------------------------|------------------------------------------------------------------------------------|-------------------------------------------------------------------------------------|-------|
| 3    |                                                                                   |                                                                                   | -0.22                                                                             | +0.38                                                                              | +0.48                                                                               | +0.50 |
| 1    |                                                                                   |                                                                                   |                                                                                   | +0.33                                                                              | 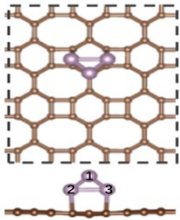 |       |
| Num. |  |  |  |  |                                                                                     |       |

**Table S2** Total Bader charge dispersion ( $|e|$ ) of the  $\text{TM}_{1-4}@\text{BPN}$  catalysts.

| Atoms | Total Charge Transfers ( $ e $ ) |                          |                          |                          |
|-------|----------------------------------|--------------------------|--------------------------|--------------------------|
|       | $\text{TM}_1@\text{BPN}$         | $\text{TM}_2@\text{BPN}$ | $\text{TM}_3@\text{BPN}$ | $\text{TM}_4@\text{BPN}$ |
| V     | +0.87                            | +1.49                    | +1.71                    | +1.69                    |
| Fe    | +0.54                            | +0.77                    | +0.91                    | +1.02                    |
| Ni    | +0.45                            | +0.46                    | +0.46                    | +0.71                    |
| Mo    | +0.64                            | +0.80                    | +0.87                    | +1.28                    |
| Ru    | +0.33                            | +0.38                    | +0.52                    | +0.86                    |
| Rh    | +0.25                            | +0.35                    | +0.26                    | +0.45                    |
| W     | +0.47                            | +0.92                    | +1.09                    | +1.55                    |
| Re    | +0.34                            | +0.69                    | +0.89                    | +1.28                    |
| Ir    | +0.13                            | +0.19                    | +0.26                    | +0.47                    |

**Table S3** Bader charge dispersion ( $|e|$ ) of the  $\text{TM}_2@\text{BPN}$  catalysts.

| DACs                     | Bader charge dispersion ( $ e $ ) of atom 1 | Bader charge dispersion ( $ e $ ) of atom 2 |
|--------------------------|---------------------------------------------|---------------------------------------------|
| $\text{V}_2@\text{BPN}$  | +0.72                                       | +0.77                                       |
| $\text{Fe}_2@\text{BPN}$ | +0.37                                       | +0.39                                       |
| $\text{Ni}_2@\text{BPN}$ | +0.25                                       | +0.21                                       |
| $\text{Mo}_2@\text{BPN}$ | +0.41                                       | +0.53                                       |

|                      |       |       |
|----------------------|-------|-------|
| Ru <sub>2</sub> @BPN | +0.19 | +0.27 |
| Rh <sub>2</sub> @BPN | +0.17 | +0.18 |
| W <sub>2</sub> @BPN  | +0.52 | +0.37 |
| Re <sub>2</sub> @BPN | +0.34 | +0.35 |
| Ir <sub>2</sub> @BPN | +0.12 | +0.04 |

**Table S4** Zero-point and entropic corrections to the free energy of the gas phase and the adsorbed species for the screened three types of catalysts (W<sub>2</sub>/Ru<sub>2</sub>/Mo<sub>4</sub>@BPN).

(a) Zero-point and entropic corrections to the free energy of the gas phase and the adsorbed species on Ru<sub>2</sub>@BPN catalysts via the enzymatic pathway.

| Name                              | E /eV        | E <sub>ZPE</sub> /eV | TS/eV      | G/eV         |
|-----------------------------------|--------------|----------------------|------------|--------------|
| H <sub>2</sub>                    | -6.76565715  | 0.268608             | 0.4019062  | -6.89895535  |
| N <sub>2</sub>                    | -16.62627336 | 0.149570             | 0.59182775 | -17.06853111 |
| NH <sub>3</sub>                   | -19.54133424 | 0.909892             | 0.5951074  | -19.22654964 |
| Ru <sub>2</sub> @BPN              | -486.967     | 0.05684              | 0.2271903  | -487.1373503 |
| *N*N                              | -504.39840   | 0.263233             | 0.262526   | -504.397693  |
| *N*NH                             | -507.75419   | 0.580410             | 0.301215   | -507.474995  |
| *NH*NH                            | -510.81563   | 0.905457             | 0.332322   | -510.242495  |
| *NH*NH <sub>2</sub>               | -495.90844   | 0.158166             | 0.252146   | -496.00282   |
| *NH <sub>2</sub> *NH <sub>2</sub> | -499.72261   | 0.431923             | 0.264371   | -499.555058  |
| *NH <sub>2</sub>                  | -503.92511   | 0.777884             | 0.276249   | -503.423475  |
| *NH <sub>3</sub>                  | -507.30855   | 1.077951             | 0.399400   | -506.629999  |

(b) Zero-point and entropic corrections to the free energy of the gas phase and the adsorbed species on W<sub>2</sub>@BPN catalysts via the consecutive pathway.

| Name                | E /eV      | E <sub>ZPE</sub> /eV | TS/eV      | G/eV         |
|---------------------|------------|----------------------|------------|--------------|
| W <sub>2</sub> @BPN | -492.703   | 0.051461             | 0.24060705 | -492.8921461 |
| *N*N                | -510.754   | 0.248102             | 0.2927833  | -510.7986813 |
| *N*NH               | -514.2436  | 0.551795             | 0.28652215 | -513.9783272 |
| *N*NH <sub>2</sub>  | -517.69413 | 0.902867             | 0.38133385 | -517.1725969 |
| *N                  | -502.12865 | 0.139228             | 0.30142965 | -502.2908517 |
| *NH                 | -506.2148  | 0.431923             | 0.264371   | -506.047248  |
| *NH <sub>2</sub>    | -509.80106 | 0.777884             | 0.276249   | -509.299425  |
| *NH <sub>3</sub>    | -513.62218 | 1.077951             | 0.3994     | -512.943629  |

(c) Zero-point and entropic corrections to the free energy of the gas phase and the adsorbed species on Mo<sub>4</sub>@BPN catalysts via the enzymatic pathway.

| Name                 | E /eV      | E <sub>ZPE</sub> /eV | TS/eV    | G/eV        |
|----------------------|------------|----------------------|----------|-------------|
| Mo <sub>4</sub> @BPN | -508.80016 | 0.12636              | 0.430841 | -509.104641 |
| *N*N                 | -526.27272 | 0.318484             | 0.54814  | -526.502376 |

|                                   |            |          |          |             |
|-----------------------------------|------------|----------|----------|-------------|
| *N*NH                             | -529.88919 | 0.629341 | 0.520026 | -529.779875 |
| *NH*NH                            | -533.6458  | 0.970263 | 0.477964 | -533.153501 |
| *NH*NH <sub>2</sub>               | -537.3689  | 1.330429 | 0.479917 | -536.518388 |
| *NH <sub>2</sub> *NH <sub>2</sub> | -540.55188 | 1.628086 | 0.589149 | -539.512943 |
| *NH <sub>2</sub>                  | -525.99895 | 0.801735 | 0.54515  | -525.742365 |
| *NH <sub>3</sub>                  | -529.77104 | 1.157585 | 0.569335 | -529.18279  |

(d) Zero-point and entropic corrections to the free energy of the gas phase and the adsorbed species on Mo<sub>4</sub>@BPN catalysts via the consecutive pathway.

| Name                 | E /eV      | E <sub>ZPE</sub> /eV | TS/eV    | G/eV        |
|----------------------|------------|----------------------|----------|-------------|
| Mo <sub>4</sub> @BPN | -508.80016 | 0.12636              | 0.430841 | -509.104641 |
| *N*N                 | -526.27272 | 0.318484             | 0.54814  | -526.502376 |
| *N*NH                | -529.88919 | 0.629341             | 0.520026 | -529.779875 |
| *N*NH <sub>2</sub>   | -533.84784 | 0.989463             | 0.488202 | -533.346579 |
| *N                   | -518.5529  | 0.236008             | 0.430523 | -518.747415 |
| *NH                  | -522.43934 | 0.533874             | 0.428223 | -522.333689 |
| *NH <sub>2</sub>     | -525.97361 | 0.801735             | 0.54515  | -525.717025 |
| *NH <sub>3</sub>     | -529.7828  | 1.157585             | 0.569335 | -529.19455  |

(e) Zero-point and entropic corrections to the free energy of the gas phase and the adsorbed species on Mo<sub>4</sub>@BPN catalysts via the enzymatic pathway using PBE+ U functional.

| Name                 | E /eV    | E <sub>ZPE</sub> /eV | TS/eV    | G/eV        |
|----------------------|----------|----------------------|----------|-------------|
| Mo <sub>4</sub> @BPN | -494.574 | 0.090803             | 0.522202 | -495.005399 |
| *N*N                 | -512.941 | 0.280524             | 0.585392 | -513.245868 |
| *N*NH                | -516.784 | 0.578571             | 0.505436 | -516.710865 |
| *N*NH <sub>2</sub>   | -520.559 | 0.945462             | 0.561028 | -520.174566 |
| *N                   | -505.224 | 0.175477             | 0.483677 | -505.5322   |
| *NH                  | -509.165 | 0.466069             | 0.439419 | -509.13835  |
| *NH <sub>2</sub>     | -512.657 | 0.803384             | 0.532326 | -512.385942 |
| *NH <sub>3</sub>     | -517.076 | 1.098221             | 0.611879 | -516.589658 |

(f) Zero-point and entropic corrections to the free energy of the gas phase and the adsorbed species on the water solvation catalyst Mo<sub>4</sub>@BPN via the enzymatic pathway.

| Name                 | E /eV        | E <sub>ZPE</sub> /eV | TS/eV    | G/eV         |
|----------------------|--------------|----------------------|----------|--------------|
| Mo <sub>4</sub> @BPN | -513.3199405 | 0.12636              | 0.430841 | -513.6244215 |
| *N*N                 | -531.0950405 | 0.318484             | 0.54814  | -531.3246965 |
| *N*NH                | -534.8721405 | 0.629341             | 0.520026 | -534.7628255 |

|                    |              |          |          |              |
|--------------------|--------------|----------|----------|--------------|
| *N*NH <sub>2</sub> | -538.8083405 | 0.989463 | 0.488202 | -538.3070795 |
| *N                 | -523.6277405 | 0.236008 | 0.430523 | -523.8222555 |
| *NH                | -527.6133405 | 0.533874 | 0.428223 | -527.5076895 |
| *NH <sub>2</sub>   | -531.0011405 | 0.801735 | 0.54515  | -530.7445555 |
| *NH <sub>3</sub>   | -534.9187405 | 1.157585 | 0.569335 | -534.3304905 |

  

| Mo <sub>4</sub> @BP | *N*N                                                                              | *N*NH                                                                             | *N*NH <sub>2</sub>                                                                | *N                                                                                | *NH                                                                                | *NH <sub>2</sub>                                                                    | *NH <sub>3</sub>                                                                    |
|---------------------|-----------------------------------------------------------------------------------|-----------------------------------------------------------------------------------|-----------------------------------------------------------------------------------|-----------------------------------------------------------------------------------|------------------------------------------------------------------------------------|-------------------------------------------------------------------------------------|-------------------------------------------------------------------------------------|
| N                   |  |  |  |  |  |  |  |
|                     |  |  |  |  |  |  |  |

**Table S5** The optimized geometry of screened catalysts W<sub>2</sub>@BPN, Ru<sub>2</sub>@BPN and Mo<sub>4</sub>@BPN.

W<sub>2</sub>@BPN

|                     |                     |                     |
|---------------------|---------------------|---------------------|
| 1.000000000000000   |                     |                     |
| 11.2750997542999993 | 0.0000000000000000  | 0.0000000000000000  |
| 0.0000000000000000  | 13.5749998092999995 | 0.0000000000000000  |
| 0.0000000000000000  | 0.0000000000000000  | 19.9498996734999992 |

C      W  
54      2

Direct

|                    |                    |                    |
|--------------------|--------------------|--------------------|
| 0.0589174744069909 | 0.0495851248695908 | 0.4002384903255636 |
| 0.2633317109073119 | 0.0495806496263571 | 0.4000857061860258 |
| 0.1611261756663091 | 0.1092192449380177 | 0.3989177742597703 |
| 0.1611301479008734 | 0.2157252855118958 | 0.3945943342205174 |
| 0.2630947273830969 | 0.2752648362371153 | 0.3913412752899832 |
| 0.0591622583865537 | 0.2752765854056121 | 0.3914789590181471 |
| 0.3928786734332452 | 0.0497484775005090 | 0.4021889436769226 |
| 0.5966614428488122 | 0.0500111267471929 | 0.4068076208994376 |
| 0.4947101049304376 | 0.1101504410715540 | 0.4047856932349537 |
| 0.4945782673025781 | 0.2169762708547752 | 0.4036731896001925 |
| 0.5974516717192008 | 0.2776196230431351 | 0.4080887547739839 |
| 0.3931766933982671 | 0.2756255724965028 | 0.3948429321713395 |
| 0.7255973299261240 | 0.0500144180927339 | 0.4068983121349877 |
| 0.9293705846550847 | 0.0497559857097074 | 0.4024258664652202 |
| 0.8275397397971801 | 0.1101683865092010 | 0.4049809051175812 |
| 0.8276768791960563 | 0.2169966979179701 | 0.4038797035925376 |
| 0.9290931213100785 | 0.2756458345542566 | 0.3950847146043651 |
| 0.7247843678645498 | 0.2776290140044043 | 0.4082094914421979 |
| 0.0596926398076315 | 0.3816575345608087 | 0.3860603910281712 |
| 0.2625607516402579 | 0.3816480245954263 | 0.3859185436716451 |
| 0.1611206648062264 | 0.4422326458999981 | 0.3839162685206366 |
| 0.1611187937974017 | 0.5498961896422832 | 0.3832606678953852 |
| 0.2625827749291758 | 0.6104951225032631 | 0.3846359507876160 |

|                    |                    |                    |
|--------------------|--------------------|--------------------|
| 0.0596637465067064 | 0.6104984381681485 | 0.3847368668738010 |
| 0.3920740093799090 | 0.3822935464852133 | 0.3882138716211749 |
| 0.5945661057499491 | 0.3869350669524249 | 0.4065063668243079 |
| 0.4907557330380824 | 0.4433791140110371 | 0.3903298661144237 |
| 0.4907474716694654 | 0.5487427807611269 | 0.3899226997659695 |
| 0.5945489494768147 | 0.6053796984174608 | 0.4058281448728789 |
| 0.3921142057236590 | 0.6098196903524451 | 0.3871557070513979 |
| 0.7276700103539823 | 0.3869552076006705 | 0.4066660725882638 |
| 0.9301969133977538 | 0.3823201708881855 | 0.3884516458412848 |
| 0.8315132186842914 | 0.4433945970284379 | 0.3905368359112913 |
| 0.8315196492639357 | 0.5487485340414193 | 0.3901037765808522 |
| 0.9301460170804313 | 0.6098194405390510 | 0.3873362744751034 |
| 0.7276821450454155 | 0.6053759018668259 | 0.4059283752541211 |
| 0.0591276789099236 | 0.7169279282103712 | 0.3895111461692129 |
| 0.2631142099215002 | 0.7169258269979718 | 0.3894212136743899 |
| 0.1611224154490180 | 0.7764786952111886 | 0.3925582349868447 |
| 0.1611219282130049 | 0.8829445693674245 | 0.3975601119022108 |
| 0.2633399908683692 | 0.9425716923481026 | 0.3994756169194555 |
| 0.0589136032166025 | 0.9425746033699010 | 0.3996058449027370 |
| 0.3932120913705668 | 0.7165764063389618 | 0.3932150631853355 |
| 0.5974370811845560 | 0.7146721457288087 | 0.4068756683566779 |
| 0.4945577796432790 | 0.7752566741332914 | 0.4021739446470084 |
| 0.4947370294624417 | 0.8820728156031902 | 0.4036957810751731 |
| 0.5966724420481641 | 0.9421904971830229 | 0.4062648905283081 |
| 0.3929030116174536 | 0.9424685483113694 | 0.4016290747744376 |
| 0.7247829549214861 | 0.7146695879221815 | 0.4069481690087845 |
| 0.9290412746732026 | 0.7165762133593947 | 0.3933696855544330 |
| 0.8276826289970138 | 0.7752553969000413 | 0.4023027441175687 |
| 0.8275083854972705 | 0.8820720492085941 | 0.4038402673407552 |
| 0.9293442970523325 | 0.9424756216854481 | 0.4018362522791251 |
| 0.7255745348863480 | 0.9421923780590198 | 0.4063424683482124 |
| 0.6607884248779115 | 0.4194884207954490 | 0.5086704309903570 |
| 0.6607980891407257 | 0.5744860463010018 | 0.5081461766820001 |

Ru<sub>2</sub>@BPN

1.00000000000000

11.2750997542999993 0.0000000000000000 0.0000000000000000

0.0000000000000000 13.5749998092999995 0.0000000000000000

0.0000000000000000 0.0000000000000000 19.9498996734999992

C Ru

54 2

Direct

0.0594514372053013 0.0491223121827443 0.4004455403600795

|                    |                    |                    |
|--------------------|--------------------|--------------------|
| 0.2628183981555616 | 0.0491162224175016 | 0.4002725818513345 |
| 0.1611411239129292 | 0.1091983332062871 | 0.3989790089307612 |
| 0.1611473545431312 | 0.2156572777507586 | 0.3944176452955374 |
| 0.2633537784402549 | 0.2750925354756877 | 0.3912892642126747 |
| 0.0589228684828394 | 0.2750926884349092 | 0.3914025292357582 |
| 0.3931819769609959 | 0.0492077058036947 | 0.4022917303620532 |
| 0.5964079161121145 | 0.0497454702762011 | 0.4065250089367568 |
| 0.4945643068824087 | 0.1097859190815099 | 0.4047520944828795 |
| 0.4940209185679749 | 0.2165307657729282 | 0.4037664768384216 |
| 0.5976049677687240 | 0.2765492320293596 | 0.4085270467429145 |
| 0.3929790190409399 | 0.2750360691664700 | 0.3949770130486444 |
| 0.7258316850542860 | 0.0497625279207157 | 0.4066112996973351 |
| 0.9290748978459720 | 0.0492158726475708 | 0.4025562415601601 |
| 0.8276710225232944 | 0.1098047302131358 | 0.4049768313405925 |
| 0.8282345151879575 | 0.2165564862900148 | 0.4040154865113677 |
| 0.9293008096068157 | 0.2750503414303661 | 0.3952093649248325 |
| 0.7246276456536968 | 0.2765642390250592 | 0.4086579650405436 |
| 0.0594127350648211 | 0.3818190551561336 | 0.3861119560843703 |
| 0.2628748860514683 | 0.3818163718353066 | 0.3859839744141919 |
| 0.1611388999420558 | 0.4422231329216641 | 0.3840094675972271 |
| 0.1611199048526192 | 0.5498470156973174 | 0.3833007232666601 |
| 0.2628939203922482 | 0.6102753465007020 | 0.3846340169003444 |
| 0.0593465655459378 | 0.6102778256820491 | 0.3847245551763357 |
| 0.3921422117181332 | 0.3824706897807940 | 0.3886461432882090 |
| 0.5953085987891718 | 0.3866002811236139 | 0.4065236248661834 |
| 0.4904996651125587 | 0.4432801193981287 | 0.3914012024869762 |
| 0.4904512708481262 | 0.5488530449948557 | 0.3910996322395429 |
| 0.5952589983003455 | 0.6056350858796827 | 0.4062292625120396 |
| 0.3921712320083263 | 0.6096130213353990 | 0.3876512816765993 |
| 0.7269202921030081 | 0.3866147196496910 | 0.4066765246277272 |
| 0.9301477887307265 | 0.3825029147613729 | 0.3888996467610796 |
| 0.8317694304057177 | 0.4432915601564792 | 0.3916543636608088 |
| 0.8318088250985713 | 0.5488618719450939 | 0.3913139906611321 |
| 0.9300767866710999 | 0.6096288816091964 | 0.3878257885230222 |
| 0.7269655142177016 | 0.6056447053820057 | 0.4063367989781343 |
| 0.058886508576928  | 0.7170593181413263 | 0.3893047970562256 |
| 0.2633792071099238 | 0.7170618253018458 | 0.3892271038198722 |
| 0.1611280371665674 | 0.7764818987476561 | 0.3921334562409699 |
| 0.1611269785429729 | 0.8828715469254622 | 0.3973904365101160 |
| 0.2628288453412909 | 0.9429030951101118 | 0.3995765804817195 |
| 0.0594265522157660 | 0.9429141912458606 | 0.3997351917760849 |
| 0.3929916232000478 | 0.7171383403028136 | 0.3933141316006921 |
| 0.5975912737646210 | 0.7156493180750255 | 0.4074272760745959 |
| 0.4940273863786474 | 0.7756595140347042 | 0.4021050613296004 |

|                    |                    |                    |
|--------------------|--------------------|--------------------|
| 0.4946667875664277 | 0.8824160138349738 | 0.4034749596105419 |
| 0.5964262317612669 | 0.9425217077308149 | 0.4059227541081154 |
| 0.3932389407266576 | 0.9429260570364437 | 0.4016732708812158 |
| 0.7246223288251441 | 0.7156561325959786 | 0.4074948786541073 |
| 0.9292602284301026 | 0.7171507079072843 | 0.3934605788522733 |
| 0.8282127137337739 | 0.7756663309235051 | 0.4022521263587820 |
| 0.8275771543710706 | 0.8824331655937716 | 0.4036591196567976 |
| 0.9290086175623773 | 0.9429380187122692 | 0.4019181249937793 |
| 0.7258254142832005 | 0.9425341618250020 | 0.4059953423848243 |
| 0.6606926984725138 | 0.4134950703142283 | 0.5044511751938174 |
| 0.6607731852271169 | 0.5816406091460089 | 0.5042613294577387 |

Mo<sub>4</sub>@BPN

1.0000000000000000

|                     |                     |                     |
|---------------------|---------------------|---------------------|
| 11.2750997542999993 | 0.0000000000000000  | 0.0000000000000000  |
| 0.0000000000000000  | 13.5749998092999995 | 0.0000000000000000  |
| 0.0000000000000000  | 0.0000000000000000  | 19.9498996734999992 |

C Mo

54 4

Direct

|                    |                    |                    |
|--------------------|--------------------|--------------------|
| 0.0603356483362140 | 0.0495444364726304 | 0.4032408234430238 |
| 0.2643348967121536 | 0.0495310739241941 | 0.4018021330260031 |
| 0.1623570977805098 | 0.1090591088527073 | 0.4016130453767521 |
| 0.1623446336180822 | 0.2157665756115182 | 0.3997066826889022 |
| 0.2639318775219716 | 0.2750282893512027 | 0.3970707073355589 |
| 0.0594972424394525 | 0.2751700009267679 | 0.3994370461085991 |
| 0.3933381658717161 | 0.0495775772835165 | 0.4013902187467506 |
| 0.5976502103159540 | 0.0496097491974529 | 0.4015312291251378 |
| 0.4954806384587012 | 0.1091743310898629 | 0.4006191324040599 |
| 0.4954715990058547 | 0.2158794415197920 | 0.3973956475782510 |
| 0.5980069061680368 | 0.2751880604776661 | 0.3952768756504343 |
| 0.3929797656547951 | 0.2751904073656503 | 0.3951908376675863 |
| 0.7266665905103197 | 0.0495652614106258 | 0.4020218002929450 |
| 0.9306937482226363 | 0.0495565234774761 | 0.4033417019745780 |
| 0.8286786495308393 | 0.1090915190418623 | 0.4018085760111931 |
| 0.8287016221934722 | 0.2158006498518329 | 0.3998412138685196 |
| 0.9315411811657364 | 0.2751891144026231 | 0.3994908902106213 |
| 0.7270655282729349 | 0.2750445993523722 | 0.3972224763752863 |
| 0.0596043434531760 | 0.3832138659681742 | 0.3982809771418641 |
| 0.2640747188020212 | 0.3834318363116257 | 0.3942471098426321 |
| 0.1614994269610094 | 0.4428374085180150 | 0.3964226089623099 |
| 0.1607879091734085 | 0.5491662254760438 | 0.3990382531855832 |
| 0.2646446178263883 | 0.6088430632048936 | 0.3952075548471018 |



|                    |                    |                    |
|--------------------|--------------------|--------------------|
| 0.0607442823851517 | 0.6089600561019901 | 0.4051254340921042 |
| 0.3919904867740814 | 0.3826518887251787 | 0.3908496744924503 |
| 0.5989938039624563 | 0.3826551054832014 | 0.3909016639959566 |
| 0.4954991876762483 | 0.4425012202935734 | 0.3859164199986029 |
| 0.4954912251943305 | 0.5471228395368494 | 0.3792461886515963 |
| 0.5987092519360848 | 0.6082904489411467 | 0.3820607601037838 |
| 0.3922505929098801 | 0.6082522365162395 | 0.3821563828576101 |
| 0.7269253376109054 | 0.3834402486063294 | 0.3943455633904667 |
| 0.9314514957387110 | 0.3832336428001727 | 0.3983159163334995 |
| 0.8295292336913357 | 0.4428373817228301 | 0.3964450049518263 |
| 0.8302112705172007 | 0.5491822093374034 | 0.3989704632317388 |
| 0.9302891524436776 | 0.6089449847787394 | 0.4050762870744347 |
| 0.7263249070175014 | 0.6088694021595040 | 0.3951504364016006 |
| 0.0608535151597591 | 0.7159976343571156 | 0.4082793721894377 |
| 0.2650581420708276 | 0.7161613879948251 | 0.3982813231971030 |
| 0.1611102812341818 | 0.7759863148521994 | 0.4052964655264365 |
| 0.1619553950213053 | 0.8823978146560032 | 0.4045127528301329 |
| 0.2642770546878119 | 0.9419394675749476 | 0.4024182846650485 |
| 0.0600135041822166 | 0.9425232336480459 | 0.4049555529212087 |
| 0.3919827329626200 | 0.7178008499739859 | 0.3843737833190319 |
| 0.5989615406021213 | 0.7178277482707967 | 0.3842447214410122 |
| 0.4954807924577660 | 0.7768233548406572 | 0.3925212039903321 |
| 0.4954876853286280 | 0.8830570323113669 | 0.3992822457954130 |
| 0.5979404856599180 | 0.9421736282971441 | 0.4012942985709869 |
| 0.3930469021515896 | 0.9421667035456746 | 0.4012426500826530 |
| 0.7258960778858687 | 0.7161891128728889 | 0.3982089519703385 |
| 0.9301664616219816 | 0.7159918430418553 | 0.4082077232681665 |
| 0.8299012755927998 | 0.7759818750438650 | 0.4051871923266693 |
| 0.8290586442276647 | 0.8824104152304315 | 0.4045277143423476 |
| 0.9309914225589381 | 0.9425366834946025 | 0.4050214590436715 |
| 0.7267077722421817 | 0.9419554537539752 | 0.4025362053323274 |
| 0.3841479776892236 | 0.6585150177311095 | 0.4882822089638349 |
| 0.6065985509458940 | 0.6586408951289764 | 0.4882092353620111 |
| 0.4955381608927375 | 0.5023482784579224 | 0.5234327302183140 |
| 0.4958284479709846 | 0.6028346098299684 | 0.5948162562041401 |
